# Supplementary material for: Blimp-1/PRDM1 is a critical regulator of Type III Interferon responses in mammary epithelial cells
Source: PubMed Central journal article supplement (PMC5762727; doi:10.1038/s41598-017-18652-9), 2018-01-10
Supplement: 41598_2017_18652_MOESM2_ESM.pdf [file 41598_2017_18652_MOESM2_ESM.pdf]

## **Supplementary Information**

### **Blimp-1/PRDM1 is a master regulator of Type III Interferon responses in mammary epithelial cells**

Salah Elias, Elizabeth J. Robertson, Elizabeth K. Bikoff, and Arne W. Mould

**Supplementary Table S2.** List of antibodies. Related to Figures 1, 2, 3 and 5.

| Antibody                    | Supplier                 | Cat No    | Host Species      | Dilution |
|-----------------------------|--------------------------|-----------|-------------------|----------|
| anti-Blimp-1                | Santa Cruz Biotechnology | sc-130917 | Rat monoclonal    | 1 in 500 |
| Phalloidin-Alexa Fluor 633  | Invitrogen/MP            | A22284    |                   | 1 in 100 |
| anti-Stat1 p84/p91 (E-23)   | Santa Cruz Biotechnology | sc-346    | Rabbit polyclonal | 1 in 200 |
| Anti-pStat1 (Tyr701) (58D6) | Cell Signaling           | 9167      | Rabbit monoclonal | 1 in 100 |
| Anti-STAT2 [EP1814Y]        | Abcam                    | ab134192  | Rabbit monoclonal | 1 in 200 |
| Anti-dsRNA (J2)             | SCICONS                  | 10010200  | Mouse monoclonal  | 1 in 200 |

**Supplementary Table S3.** Primers used in this study. Related to Figures 1 and 4 and Supplementary Figures S1 to S3.

| Gene                              | Purpose                     | Forward primer        | Reverse primer          |
|-----------------------------------|-----------------------------|-----------------------|-------------------------|
| Prdm1 Exon1B                      | ChIP qPCR                   | ACTGCACATACCTGGCACTC  | TCTTCCTCTTGCCTGGTTG     |
| Prdm1 3'UTR                       | ChIP qPCR                   | AATACAGGACCGAACCACCC  | GGAGTGCAGGAATTAATGTCGT  |
| <i>Stat1</i> 5' TSS peak          | ChIP qPCR                   | CGGACAGGCTGTGGGAAA    | GTGCTTTCTGGGAACTCAGC    |
| <i>Stat1</i> promoter peak        | ChIP qPCR                   | AATCTCTGCCGCTGATTGG   | GAGCTTTGACAGACTCGGC     |
| <i>Oasl2</i>                      | ChIP qPCR                   | CTCCTGTTCCCTTCTGCCTT  | GCATGGAAAGAAGAAAAGCGC   |
| <i>Usp18</i>                      | ChIP qPCR                   | GCCTGAGTTTCGCTTTCCTT  | GAGTGTCTGCTGTCCCCTAG    |
| <i>Myc</i>                        | ChIP qPCR                   | TGCGGTGACTGATATACGCA  | ACCATTTTCTCTTGCTCGCG    |
| <i>Prdm1</i>                      | RT-qPCR                     | GGCTCCACTACCCTTATCCTG | TCCTTTTGGAGGGATTGGAGTC  |
| <i>Stat1</i>                      | RT-qPCR                     | TGCTTCCCATGTCTCCAGAG  | CGCCAGAGAGAAATTCGTGT    |
| <i>Stat2</i>                      | RT-qPCR                     | GCTCTACGGTGTGCTTGTG   | TGTCCCCTGTCCCAGTTATTATT |
| <i>Isg15</i>                      | RT-qPCR                     | TCCTTAATTCCAGGGGACCT  | TAAGACCGTCTGGAGCACT     |
| <i>Usp18</i>                      | RT-qPCR                     | TTCCCTCAGAGCTTGGATTTC | CCGGATGTAGGCACAGTAATG   |
| <i>Cxcl10</i>                     | RT-qPCR                     | TTGAAATCATCCCTGCGAGC  | TGGTCTTAGATTCCGGATTCAGA |
| <i>Irf7</i>                       | RT-qPCR                     | TGATCCTGGTGAAGCTGGAG  | GGGATTCTGAGTCAAGGCCA    |
| <i>Irf9</i>                       | RT-qPCR                     | CCTCTTTGTTACGCGCCTTT  | CCTGGAAGTACTGGGCCAAA    |
| <i>Oasl1</i>                      | RT-qPCR                     | CAGACCCACCAACAATGTG   | CTGCACGGTCACCTGGATAT    |
| <i>Oasl2</i>                      | RT-qPCR                     | CATCCTAGACCCAGCTGACC  | TCTCACCTGAACATCCCTCG    |
| <i>Hprt</i>                       | RT-qPCR and One-Step RT-PCR | GCTGGTGAAAAGGACCTCT   | CACAGGACTAGAACACCTGC    |
| <i>IFN<math>\lambda</math>2/3</i> | RT-qPCR and One-Step RT-PCR | TGGGAGTGAATGTGGCTCAG  | AGCTGCAGGCCTTCAAAAAG    |
| <i>IFN<math>\beta</math></i>      | One-Step RT-PCR             | CTACAGGGCGGACTTCAAGA  | AGTGGAGAGCAGTTGAGGAC    |
| <i>IFN<math>\gamma</math></i>     | One-Step RT-PCR             | TCCTGCAGAGCCAGATTATCT | ATCAGCAGCGACTCCTTTTC    |

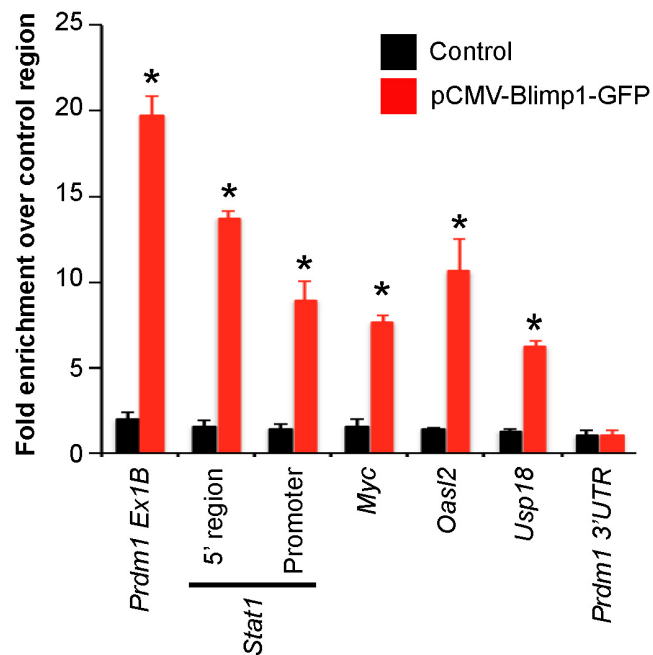

**Supplementary Figure S1. qPCR validation of Blimp-1 target genes.** Related to Figure 2 and Table S3. Transiently transfected CommaD $\beta$  mammary epithelial cells expressing eGFP-tagged Blimp-1 fusion protein were processed for ChIP using the anti-GFP monoclonal antibody.

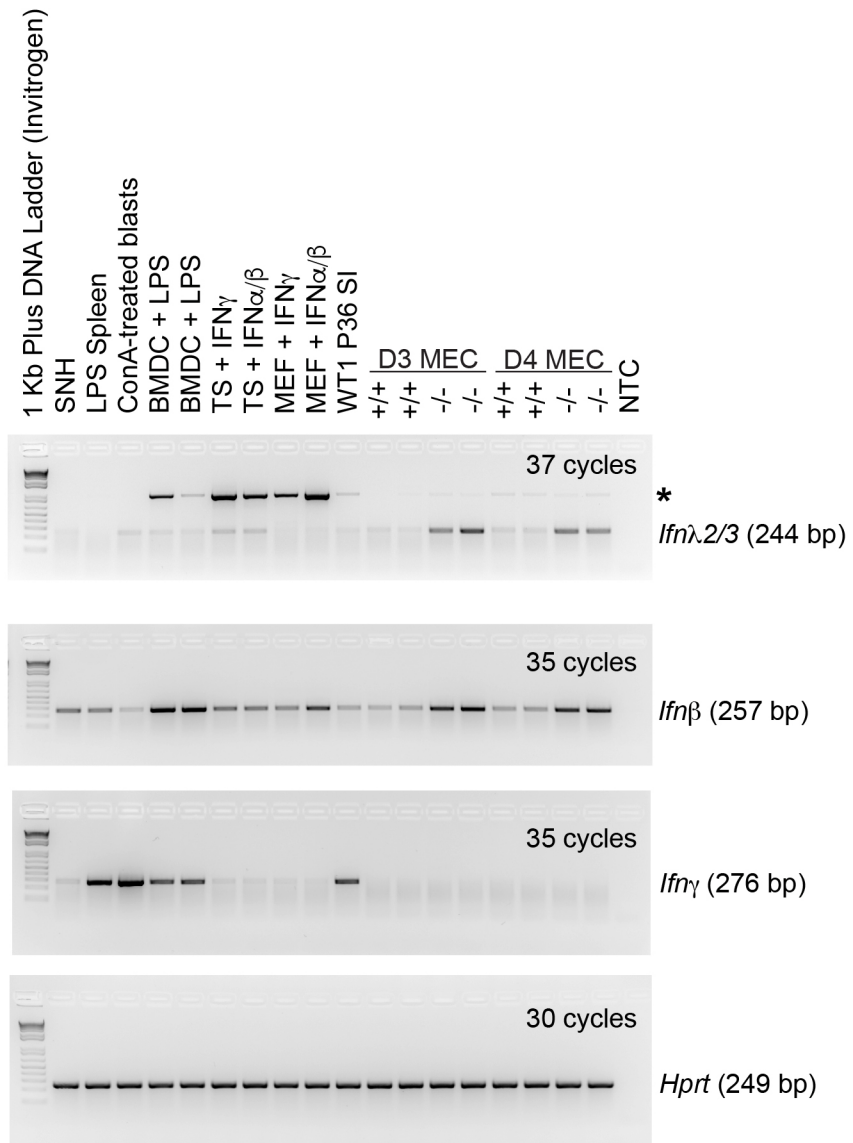

**Supplementary Figure S2. Uncropped RT-PCR gel images related to Figure 4.**

PCR cycle numbers for each transcript are indicated. \*A higher molecular weight *IFNλ2/3* PCR amplicon (approximately 950 bp) is also observed in some positive control samples due to the amplification of residual levels of gDNA at the higher PCR cycle number.

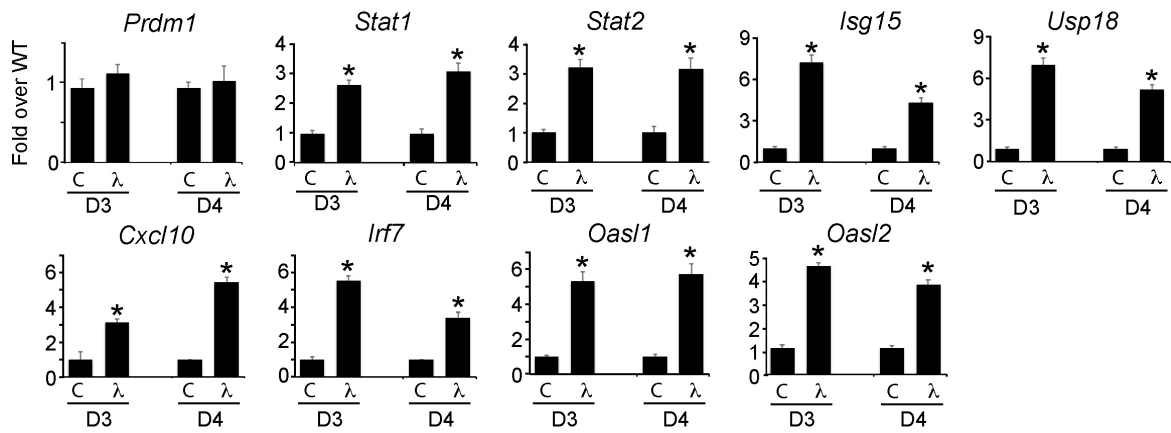

**Supplementary Figure S3. qPCR analysis validates up-regulated expression of IFN signaling genes caused by treatment with type III IFN lambda.** Related to Figure 5. \*P value < 0.05 (unpaired Student's *t*-test). Data represents mean  $\pm$  SEM of 4 samples each for control (C) and IFN lambda ( $\lambda$ )-treated groups.

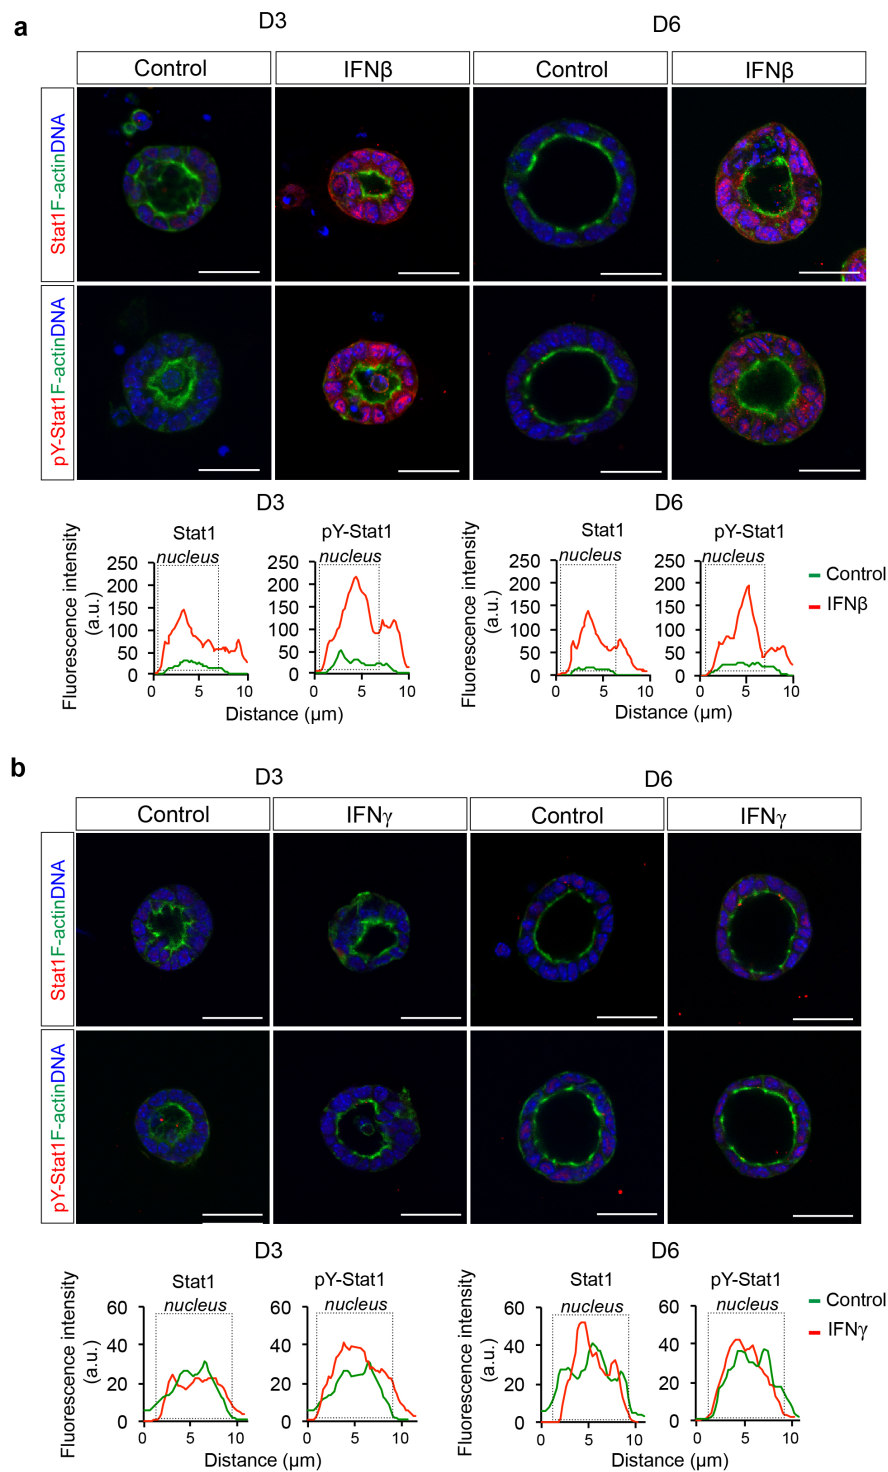

**Supplementary Figure S4. Increased levels of Stat1 and pY-Stat1 induced by treatment with type I IFN beta but not type II IFN gamma.** Related to Figure 5. MEC 3D cultures treated with (a) IFN beta and (b) IFN gamma and stained for Stat1 and pY-Stat1 by immunofluorescence. Representative line scan-analysis (fluorescence intensity in arbitrary units, a.u., minimum 20 cells/group analyzed). Scale bars: 50  $\mu$ m.
